# Supplementary material for: Beyond Craig and Gordon: A model of water vapor isotopologues inthe marine boundary layer
Source: Copernicus journal article supplement (doi:10.5194/acp-2018-709), 2018-09-11
Supplement: Supplementary file [file acp-2018-709-AC1-supplement.pdf]

Comment from authors:

There is some error in Eqn. 16. The correct form should be

$$C(z) = \frac{C_0 \ln[h_1 K_{max}] + (C_1 - C_0) \ln[h_1 K_m + (K_{max} - K_m)z] - C_1 \ln[h_1 K_m]}{\ln [K_{max}/K_m]}$$

We apologize for the mistake! The code that generated the results is correct, and so all data plotted are correct.
